# Supplementary material for: A 3D bioprinted liposarcoma tumor microenvironment model recapitulates stroma-driven invasion and chemoresistance
Source: Royal Society of Chemistry journal article supplement (doi:10.1039/d5tb01845e), 2025-12-23
Supplement: d5tb01845e1.pdf [file d5tb01845e1.pdf]

Supplementary Figure 1

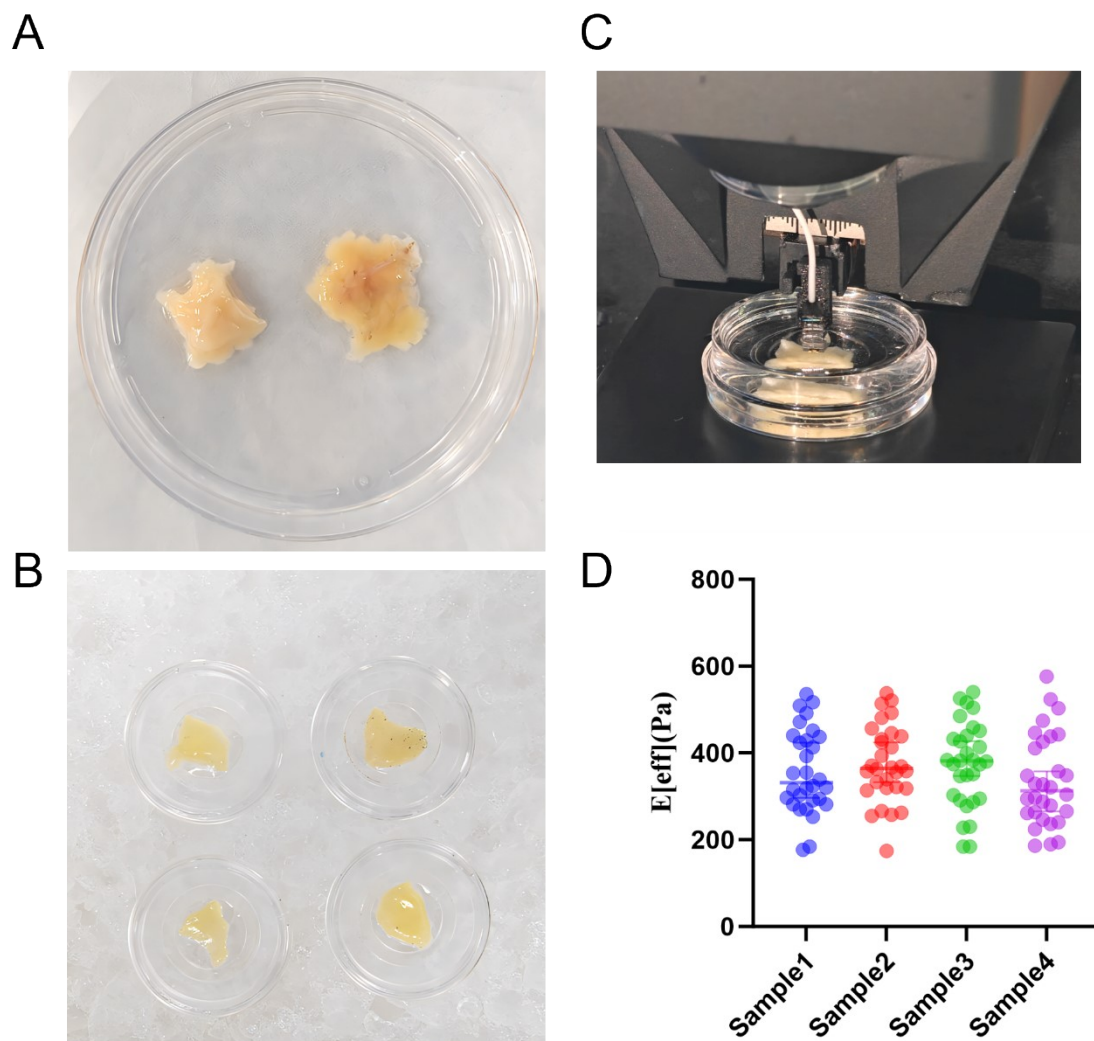

Supplementary Figure 1. Mechanical characterization of the liposarcoma samples. (A) Gross view of the liposarcoma samples. (B) Liposarcoma samples prepared for Young's modulus measurement. (C) Measurement of the tissue's Young's modulus was performed using a nanoindenter. (D) The Young's modulus of liposarcoma samples (n=4).

## **Supplementary Materials, S1**

### **Cell Lines and Culture Conditions**

#### **1. Quality Control**

To ensure experimental reliability and reproducibility, all cell lines underwent short tandem repeat (STR) profiling upon receipt and prior to cryopreservation to verify identity and exclude cross-contamination.

Additionally, cultures were routinely tested for mycoplasma contamination every 2–4 weeks using PCR-based detection kits, confirming all experiments were conducted under mycoplasma-free conditions.

#### **2. Culture of SW872 Liposarcoma Cells**

SW872 cells were cultured in Leibovitz's L-15 medium supplemented with 10% fetal bovine serum and 1% penicillin-streptomycin (100 U/mL penicillin, 100 µg/mL streptomycin). Due to the medium's phosphate and free-base amino acid buffering system, which causes pH shifts upon CO<sub>2</sub> exposure leading to cellular toxicity, cells were maintained at 37°C in a humidified incubator with 100% air and no CO<sub>2</sub> supplementation.

#### **3. Isolation and Culture of Primary Cancer-Associated Fibroblasts (CAFs)**

Briefly, sterile fresh tumor tissue was washed in PBS, cleared of necrotic and adipose regions, and mechanically minced into 1–2 mm<sup>3</sup> fragments using a scalpel. Fragments were transferred to centrifuge tubes containing dissociation buffer with type I collagenase (1 mg/mL) and hyaluronidase (100 U/mL). The resulting cell suspension was filtered through a 70 µm cell strainer to remove debris, centrifuged, and resuspended in high-glucose DMEM supplemented with 10% FBS, 1% penicillin-streptomycin, and 2 mM L-glutamine before plating in tissue culture dishes. To enrich for CAFs, medium was replaced 2–4 h post-plating to remove non-adherent tumor cells, exploiting fibroblasts' faster attachment.

Isolated primary CAFs were used only at early passages to prevent phenotype drift and senescence from prolonged culture. CAF identity was confirmed via flow cytometry or immunofluorescence, showing high expression of  $\alpha$ -smooth muscle actin ( $\alpha$ -SMA) and fibroblast activation protein (FAP), with negligible expression of epithelial (EpCAM) and endothelial (CD31) markers, verifying an activated fibroblast phenotype.

#### **4. Culture of Human Umbilical Vein Endothelial Cells (HUVECs)**

HUVECs were cultured in Endothelial Cell Growth Medium-2 (EGM-2) BulletKit™, comprising Endothelial Basal Medium-2 (EBM-2) supplemented with vascular endothelial growth factor (VEGF), human fibroblast growth factor-B (hFGF-B), R3-insulin-like growth factor-1 (R3-IGF-1), human epidermal growth factor (hEGF), hydrocortisone, and FBS. This optimized medium supports HUVEC phenotype, proliferation, and angiogenic function. Culture flasks were precoated with 0.1% (w/v) gelatin for 30 min to enhance adhesion. Experiments employed low-passage (P3–P7) HUVECs to maintain robust proliferation and tubulogenesis.

## **Supplementary Materials, S2**

### **RNA Sequencing and Data Preprocessing**

#### **1. RNA Sequencing and Data Preprocessing**

To elucidate molecular mechanisms of TME-induced cellular reprogramming, FACS-sorted SW872 and CAF populations (TME co-culture vs. 3D monoculture controls) underwent high-throughput RNA sequencing. High-quality RNA (RIN > 8.0) was ensured. Strand-specific libraries were constructed using Illumina Stranded Total RNA Prep with Ribo-Zero Plus Kit, depleting rRNA to enrich mRNA and lncRNA while preserving strand information. Libraries were sequenced on Illumina NovaSeq, yielding 150 bp paired-end reads.

Raw reads underwent FastQC quality assessment, followed by Trimmomatic for adapter/low-quality trimming. Clean reads were aligned to the human reference genome (GRCh38/hg38) via STAR. Gene-level counts were generated using featureCounts, forming the expression matrix.

#### **2. Differential Expression and Functional Enrichment**

In R, DESeq2 normalized counts and identified differentially expressed genes (DEGs; adjusted  $p < 0.05$ ,  $|\log_2(\text{Fold Change})| > 1$ ). clusterProfiler performed Gene Ontology (GO) and Kyoto Encyclopedia of Genes and Genomes (KEGG) enrichment on up- and down-regulated DEGs separately to elucidate biological functions.

#### **3. Gene Set Enrichment Analysis (GSEA)**

GSEA (Broad Institute) detected coordinated gene set changes across all genes ranked by expression differences. The Molecular Signatures Database (MSigDB) "Hallmark" gene sets, highly curated and low-redundancy, identified key cancer processes like epithelial-mesenchymal transition (EMT), G2M checkpoint, and KRAS signaling.

#### **4. Intercellular Communication Network Analysis**

To infer signaling between SW872 cells and CAFs, iTALK R package analyzed transcriptomic data against its curated ligand-receptor database, identifying significant interactions. Comparing TME co-culture vs. monoculture networks highlighted TME-activated axes, such as TGF- $\beta$ , integrin, and VEGF pathways.

**Table S1. Key commercial reagents, kits, consumables, and antibodies.**

| Materials                                           | Supplier (city, country)           | Catalog number |
|-----------------------------------------------------|------------------------------------|----------------|
| Human liposarcoma cell line SW872                   | Nobelbio (Hangzhou, China)         | nobcell0426    |
| Human umbilical vein endothelial cells (HUVEC)      | Lonza (Basel, Switzerland)         | C2517A         |
| Leibovitz's L-15 medium                             | ATCC (Manassas, VA, USA)           | 30-2008        |
| Endothelial Cell Growth Medium-2 (EGM-2) BulletKit™ | Lonza (Basel, Switzerland)         | CC-3162        |
| High-glucose DMEM medium                            | Gibco (Grand Island, NY, USA)      | C11995500BT    |
| Fetal bovine serum (FBS)                            | Gibco (Grand Island, NY, USA)      | 10270106       |
| Penicillin–streptomycin solution (100×)             | Gibco (Grand Island, NY, USA)      | 15140122       |
| L-glutamine                                         | Gibco (Grand Island, NY, USA)      | 25030081       |
| Accutase® cell dissociation reagent                 | Cytion (Heidelberg, Germany)       | 810100a        |
| 0.25% trypsin–EDTA                                  | Gibco (Grand Island, NY, USA)      | 25200072       |
| Type I collagen, rat tail, 10 mg/mL                 | ibidi (Gräfelfing, Germany)        | 50206          |
| Phosphate-buffered saline (PBS), 10×                | Gibco (Grand Island, NY, USA)      | 70011044       |
| Sodium hydroxide (NaOH)                             | Sigma-Aldrich (St. Louis, MO, USA) | S8045          |
| Lentiviral expression vector (pLenti-CMV-Puro)      | Addgene (Watertown, MA, USA)       | #17448         |
| Polybrene (hexadimethrine bromide)                  | Sigma-Aldrich (St. Louis, MO, USA) | H9268          |
| Puromycin                                           | Sigma-Aldrich (St. Louis, MO, USA) | P8833          |
| Doxorubicin                                         | Sigma-Aldrich (St. Louis, MO, USA) | D1515          |
| LIVE/DEAD™ Viability/Cytotoxicity Kit               | Invitrogen (Carlsbad, CA, USA)     | L3224          |
| CellTiter-Glo® 3D Cell Viability Assay Kit          | Promega (Madison, WI, USA)         | G9681          |
| Annexin V–FITC/PI Apoptosis Detection Kit           | Vazyme (Nanjing, China)            | A211-02        |
| Bright-Glo™ Luciferase Assay System                 | Promega (Madison, USA)             | E2610          |

|                                                  |                                        |          |
|--------------------------------------------------|----------------------------------------|----------|
| TRIzol™ reagent                                  | Invitrogen (Carlsbad, CA, USA)         | 15596026 |
| HiScript® III RT SuperMix for qPCR (+gDNA wiper) | Vazyme (Nanjing, China)                | R323-01  |
| ChamQ Universal SYBR qPCR Master Mix             | Vazyme (Nanjing, China)                | Q711-02  |
| Transwell® permeable support inserts (0.4 µm)    | Corning (Corning, NY, USA)             | CLS3413  |
| BIO X™ 3D bioprinter                             | CELLINK (Gothenburg, Sweden)           | -        |
| LSRFortessa™ flow cytometer                      | BD Biosciences (San Jose, CA, USA)     | -        |
| FACSaria™ III cell sorter                        | BD Biosciences (San Jose, CA, USA)     | -        |
| LSM 880 confocal laser scanning microscope       | ZEISS (Oberkochen, Germany)            | -        |
| Piuma nanoindenter                               | Optics11 Life (Amsterdam, Netherlands) | -        |
| Rotational rheometer                             | Anton Paar (Graz, AUSTRIA)             | -        |

**Table S2. Primers Used for RT-qPCR**

| Gene Symbol | Forward Primer (5'→3')  | Reverse Primer (5'→3') |
|-------------|-------------------------|------------------------|
| MKI67       | GGGCCAATCCTGTCGCTTAAT   | GTTATGCGCTTGCGAACCT    |
| CXCL12      | ATTCTCAACACTCCAAACTGTGC | CTTTAGCTTCGGGTCAATGC   |
| COL1A1      | GAGGGCCAAGACGAAGACATC   | CAGATCACGTCATCGCACAAAC |
| COL1A2      | GCCCCACCCAGAACTCATAC    | GGTCTTGATGTCACCCTTTGC  |
| CCN1        | AATGCCTGCACCAGACCAAC    | GCGAGCTGCATTCGAAACTC   |
| CD34        | CTACAACACCTAGTACCCTTGGA | GGTGAACACTGTGCTGATTACA |
| VEGFA       | TTGCCTTGCTGCTCTACCTCCA  | GATGGCAGTAGCTGCGCTGATA |
| MMP9        | GCCACTACTGTGCCTTTGAGTC  | CCCTCAGAGAATCGCCAGTACT |
| PCNA        | CCTGCTGGGATATTAGCTCCA   | CAGCGGTAGGTGTCGAAGC    |
| GAPDH       | TGTGGGCATCAATGGATTTGG   | ACACCATGTATTCCGGGTCAAT |
